# Supplementary material
Source: Springer Nature journal article supplement (https://www.springermedizin.de/resource/supplementary/12889_2001_20_MOESM2_ESM.pdf/9500180)
Supplement: MOESM2 [file 9500180]

**National SES**

**37 Districts**

**7 Cities**

**37 District SESs**

**6 Cities**

**Yerevan  
(8 Districts)**

**6 City SESs**

**8 District SESs**
